# Supplementary material for: NAA80 bi-allelic missense variants result in high-frequency hearing loss, muscle weakness and developmental delay
Source: PubMed Central journal article supplement (PMC8599064; doi:10.1093/braincomms/fcab256), 2021-10-26
Supplement: fcab256_supplementary_data.pdf [file fcab256_supplementary_data.pdf]

| Actin type | Acetylation                             | Sequence                 | m/z      | targeted<br>[M+2H] <sup>2+</sup> |
|------------|-----------------------------------------|--------------------------|----------|----------------------------------|
| beta       | no                                      | DDDIAALVVDNGSGMCK        | 1795.783 | 898.395                          |
| beta       | <sup>12</sup> C/ <sup>1</sup> H acetate | <b>DDDIAALVVDNGSGMCK</b> | 1837.793 | 919.400                          |
| beta       | <sup>13</sup> C/ <sup>2</sup> H acetate | <b>DDDIAALVVDNGSGMCK</b> | 1742.819 | 921.913                          |
| gamma      | no                                      | EEEIAALVIDNGSGMCK        | 1851.845 | 926.426                          |
| gamma      | <sup>12</sup> C/ <sup>1</sup> H acetate | <b>EEEIAALVIDNGSGMCK</b> | 1893.855 | 947.431                          |
| gamma      | <sup>13</sup> C/ <sup>2</sup> H acetate | <b>EEEIAALVIDNGSGMCK</b> | 1898.881 | 949.944                          |

**Supplementary Table S1:** List of the 6 theoretical peptide sequences that were targeted by mass spectrometry. Meaning of bold amino acids: oxidation of **M** (+15.994 Da), carbamidomethyl of **C** (+57.021 Da), N-term acetylation for **E** or **D** (+42.010 Da for <sup>12</sup>C<sub>2</sub>/<sup>1</sup>H<sub>3</sub> and +47.037 Da for <sup>13</sup>C<sub>2</sub>/<sup>2</sup>H<sub>3</sub>).

| Label | Chromosome | Start       | Stop        | Size     |
|-------|------------|-------------|-------------|----------|
| ROH   | 3          | 45.476.694  | 54.264.197  | 8.788 MB |
| ROH   | 9          | 65.629.772  | 69.824.256  | 4.194 MB |
| ROH   | 5          | 129.486.905 | 132.169.532 | 2.683 MB |
| ROH   | 15         | 42.922.656  | 45.394.057  | 2.471 MB |
| ROH   | 1          | 142.541.502 | 144.931.626 | 2.39 MB  |
| ROH   | 12         | 85.356.224  | 87.722.701  | 2.366 MB |
| ROH   | 5          | 44.442.578  | 46.404.402  | 1.962 MB |

**Supplementary Table S2:** Identity by descent (IBD) regions found in proband 1.2 with SNP Array. Runs of Homozygosity (ROH) are contiguous regions of the genome where the individual is homozygous across all sites.

**Supplementary Figure 1:**

XIC for precursor ions  
Targeted N-term peptide: Ac-EEEIAALVIDNGSGM<sub>ox</sub>C<sub>cm</sub>K

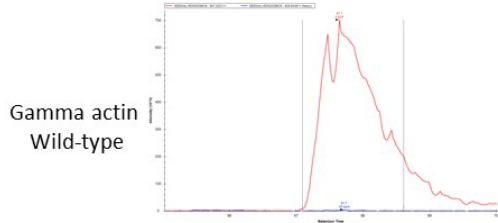

Gamma actin  
NAA80 deficient

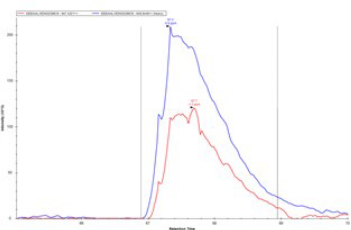

XIC for daughter ions from Nat6 deficient cells  
Targeted N-term peptide: Ac-EEEIAALVIDNGSGM<sub>ox</sub>C<sub>cm</sub>K

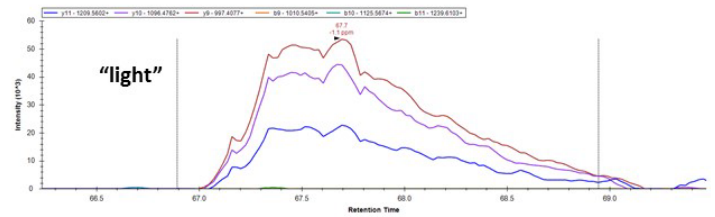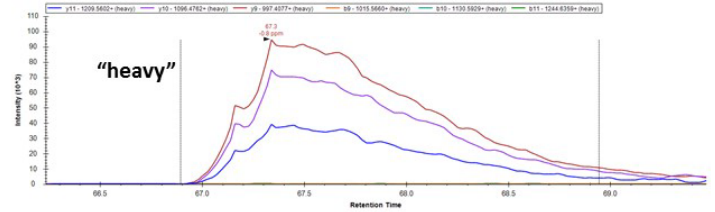

MS/MS spectra for <sup>12</sup>C<sub>2</sub>/<sup>1</sup>H<sub>3</sub> "light" peptide

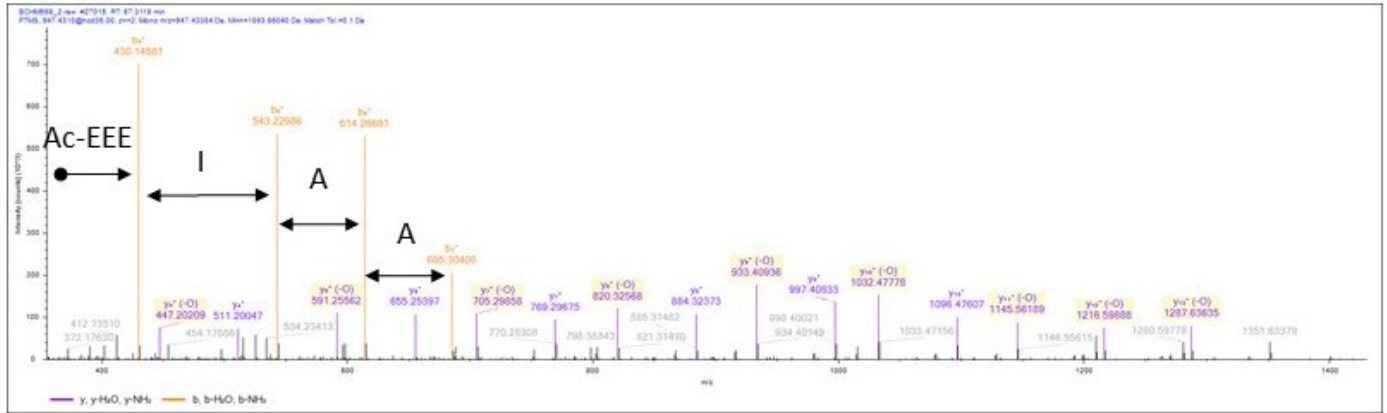

MS/MS spectra for <sup>13</sup>C<sub>2</sub>/<sup>2</sup>H<sub>3</sub> "heavy" peptide

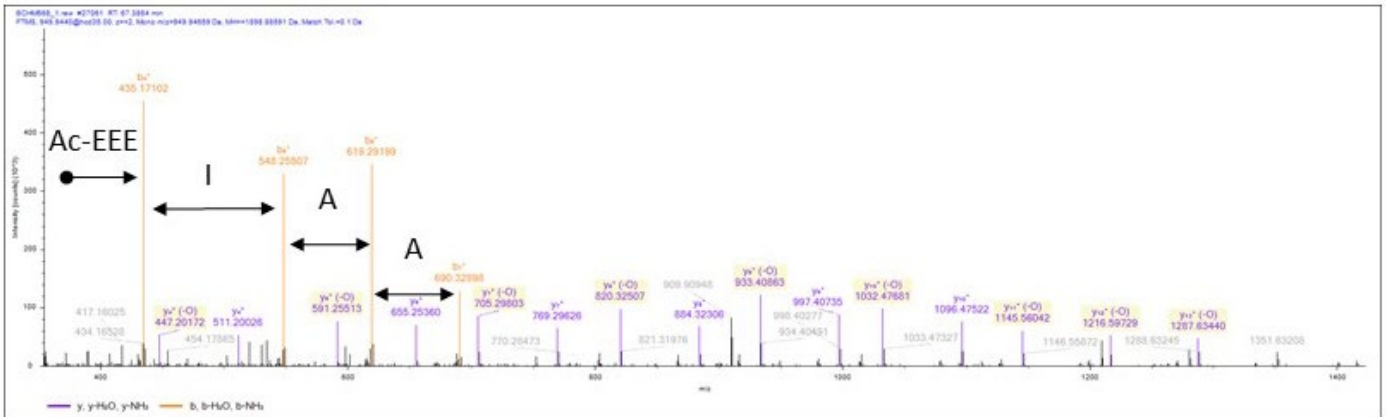

**Supplementary Figure 1:** Identification and quantification of the N-terminal acetylated peptide from gamma actin by targeted mass spectrometry. A PRM MS/MS method was designed to measure the two acetylated forms (light or heavy) of the processed N-term peptide taking oxidation of Met ( $M_{ox}$ ) and carbamidomethylation of Cys ( $C_m$ ) as fixed modifications. *Left upper panel:* XIC of the two precursors ions (light in red  $m/z=947.432$ , heavy in blue  $m/z=949.948$ ) for a control and the NAA80 deficient individual. *Right upper panel:* example from a NAA80 deficient individual of the XIC of all daughter ions taken into account for quantification by their area under the curve (AUC). *Lower panel:* MS/MS spectra of the light and heavy +2 precursors ions, the b-ions series shows the incorporation of a heavy acetylated group at the N-term side of the peptide with a mass difference of 5.027 Da from their light counterpart. (-O) denotes neutral loss of  $H_4COS$  from the side chain of Cys.

**Supplementary Figure 2.**

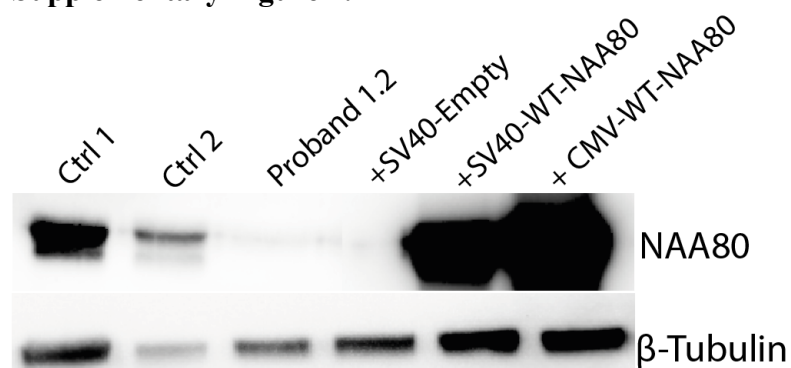

Western blot showing NAA80 expression in healthy controls (Ctrl 1, Ctrl 2) and proband 1.2 with and without (SV40-Empty) vectors expressing NAA80 WT cDNA using either a CMV or SV40 promoter.

**Supplementary Table S3:**

| Gene   | Considerations regarding pathogenicity                                                                                                                                                                                                                                                                                                                     | Chromosome | Start    | Stop    | Genotype | cDNA      | Protein  | PhyloP and PhastCons          |
|--------|------------------------------------------------------------------------------------------------------------------------------------------------------------------------------------------------------------------------------------------------------------------------------------------------------------------------------------------------------------|------------|----------|---------|----------|-----------|----------|-------------------------------|
| PRR14L | The PRR14L variant is not present in affected proband 1.4. Phenylalanine and Tyrosine have similar properties and this change is thus not expected to impact the protein structure significantly.                                                                                                                                                          | 22         | 32084196 | 3.2E+07 | A/T      | c.6125T>A | p.F2042Y | PhyloP: 3.958, PhastCons: 1   |
| PLXNB1 | Segregates with affected individuals (proband 1.2 and 1.4). Affected residue is not conserved. Serine and glycine have similar properties and this change is thus not expected to impact the protein structure significantly. The variant is located in a region of low conservation in the protein. Serine to glycine has been observed in other species. | 3          | 48460754 | 4.8E+07 | C/C      | c.2731A>G | p.S911G  | PhyloP: -0.153, PhastCons: 0. |
| NAA80  | Segregates with affected individuals (proband 1.2 and 1.4). Very                                                                                                                                                                                                                                                                                           | 3          | 50334572 | 5E+07   | G/G      | c.323T>C  | p.L108P  | PhyloP: 4.572, PhastCons: 1   |

|       |                                                                                                             |   |          |         |   |          |         |                                |
|-------|-------------------------------------------------------------------------------------------------------------|---|----------|---------|---|----------|---------|--------------------------------|
|       | conserved residue, amino-acid change predicted to result in altered protein confirmation (loss of proline). |   |          |         |   |          |         |                                |
| HDAC6 | The HDAC6 variant is also present in one of the healthy male siblings (proband 1.1).                        | X | 48663916 | 4.9E+07 | C | c.383G>C | p.C128S | PhyloP: 1.82, PhastCons: 0.998 |

**Supplementary Table S3:** Genetic variants in proband 1.2 found with Whole Exome Sequencing that remain after filtering.

**Supplementary Table S4**

| Phenotypic Feature                              | NAA80     | ACTB     | ACTG1    | ACTA1     | ACTA2 | ACTG2 | ACTC1 |
|-------------------------------------------------|-----------|----------|----------|-----------|-------|-------|-------|
| High-frequency sensorineural hearing impairment | 50        | 0        | 35       | 0         | 0     | 0     | 0     |
| Prominence of the zygomatic bone                | 25        | 1.515152 | 1.282051 | 0         | 0     | 0     | 0     |
| Congenital ptosis                               | 25        | 5.30303  | 8.333333 | 0         | 0     | 0     | 0     |
| High-frequency hearing impairment               | 14.28571  | 0        | 1.848539 | 0         | 0     | 0     | 0     |
| Snoring                                         | 14.28571  | 0        | 0        | 0         | 0     | 0     | 0     |
| Peg Shaped maxillary lateral incisors           | 11.1111   | 1.31     | 0        | 0         | 0     | 0     | 0     |
| Infantile axial hypotonia                       | 7.69      | 0        | 0        | 0.3042156 | 0     | 0     | 0     |
| Widely-spaced maxillary central incisors        | 7.14      | 0.67     | 0        | 0         | 0     | 0     | 0     |
| Progressive sensorineural hearing impairment    | 2.325581  | 0.422833 | 1.471985 | 0         | 0     | 0     | 0     |
| Brain imaging abnormality                       | 1.5625    | 0.260417 | 0        | 0         | 0     | 0     | 0     |
| Low posterior hairline                          | 1.470588  | 0.039872 | 0        | 0         | 0     | 0     | 0     |
| Prominent metopic ridge                         | 1.25      | 0.113636 | 0        | 0         | 0     | 0     | 0     |
| Sleep Apnea                                     | 1.162791  | 0        | 0        | 0         | 0     | 0     | 0     |
| Tapered finger                                  | 1.07526   | 0.017618 | 0.053419 | 0         | 0     | 0     | 0     |
| Everted lower lip vermilion                     | 1.02      | 0.030921 | 0        | 0         | 0     | 0     | 0     |
| Self-injurious behavior                         | 0.99      | 0        | 0        | 0         | 0     | 0     | 0     |
| Microretrognathia                               | 0.980392  | 0.089127 | 0        | 0         | 0     | 0     | 0     |
| Eclabion                                        | 0.9259259 | 0.028058 | 0        | 0         | 0     | 0     | 0     |
| Synophrys                                       | 0.892857  | 0.040584 | 0        | 0         | 0     | 0     | 0     |
| Downturned corners of mouth                     | 0.862069  | 0.026123 | 0        | 0         | 0     | 0     | 0     |
| Highly arched eyebrow                           | 0.7462687 | 0.135685 | 0.0333   | 0         | 0     | 0     | 0     |
| Failure to thrive in infancy                    | 0.6493506 | 0.059032 | 0        | 0         | 0     | 0     | 0     |
| Muscular hypotonia of the Trunk                 | 0.5813953 | 0        | 0        | 1.0290698 | 0     | 0     | 0     |

**Supplementary Table S4:** Phenotypic features with their corresponding occurrence ratio in individuals with NAA80 genetic variants or actin mutations (ACTB, ACTG1, ACTA1, ACTA2, ACTG2, ACTC1).
